# Supplementary material
Source: publisher figshare collection journal article supplement (https://acs.figshare.com/ndownloader/files/5729565)
Supplement: Supplementary file 1 [file 5729565]

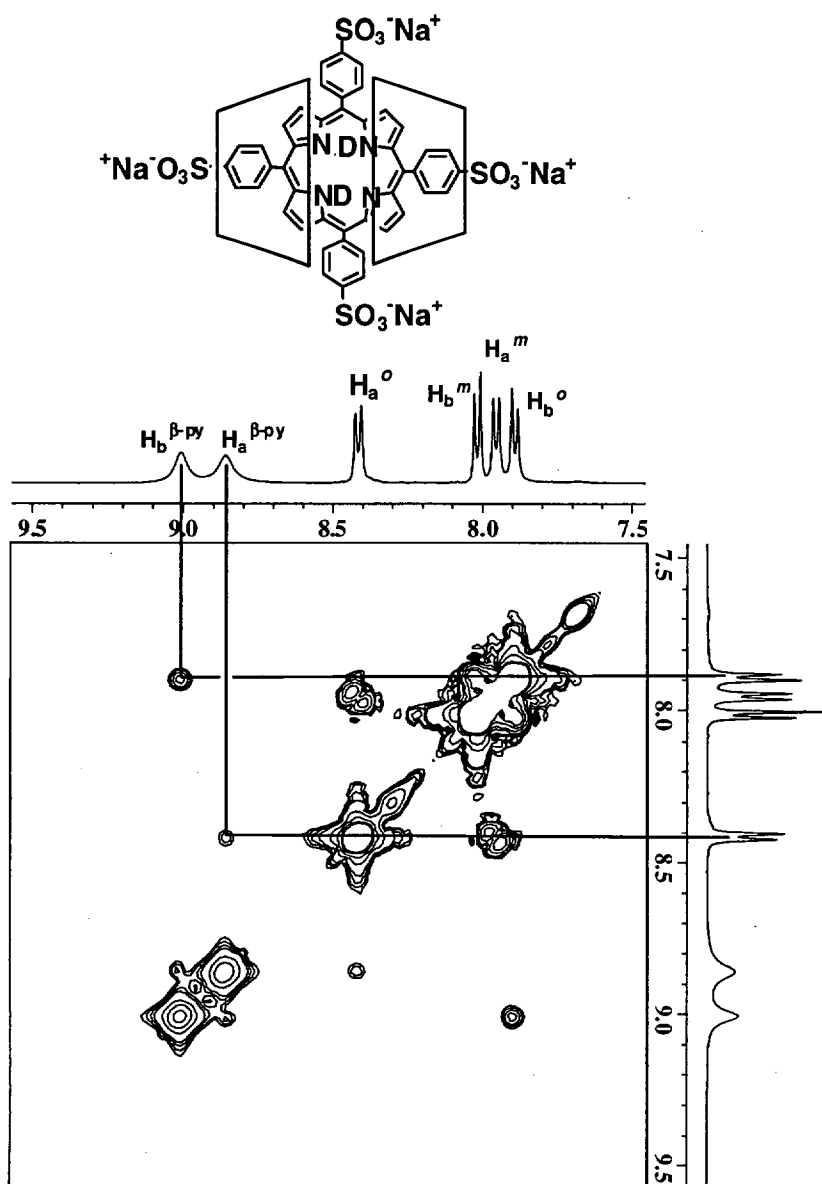

**SI Figure 1.** ROESY spectrum of the aromatic region of the TMe- $\beta$ -CD-TPPS<sub>4</sub> complex in D<sub>2</sub>O at 25 °C: [TPPS<sub>4</sub>]<sub>0</sub> = 0.05 M; [TMe- $\beta$ -CD]<sub>0</sub> = 0.1 M

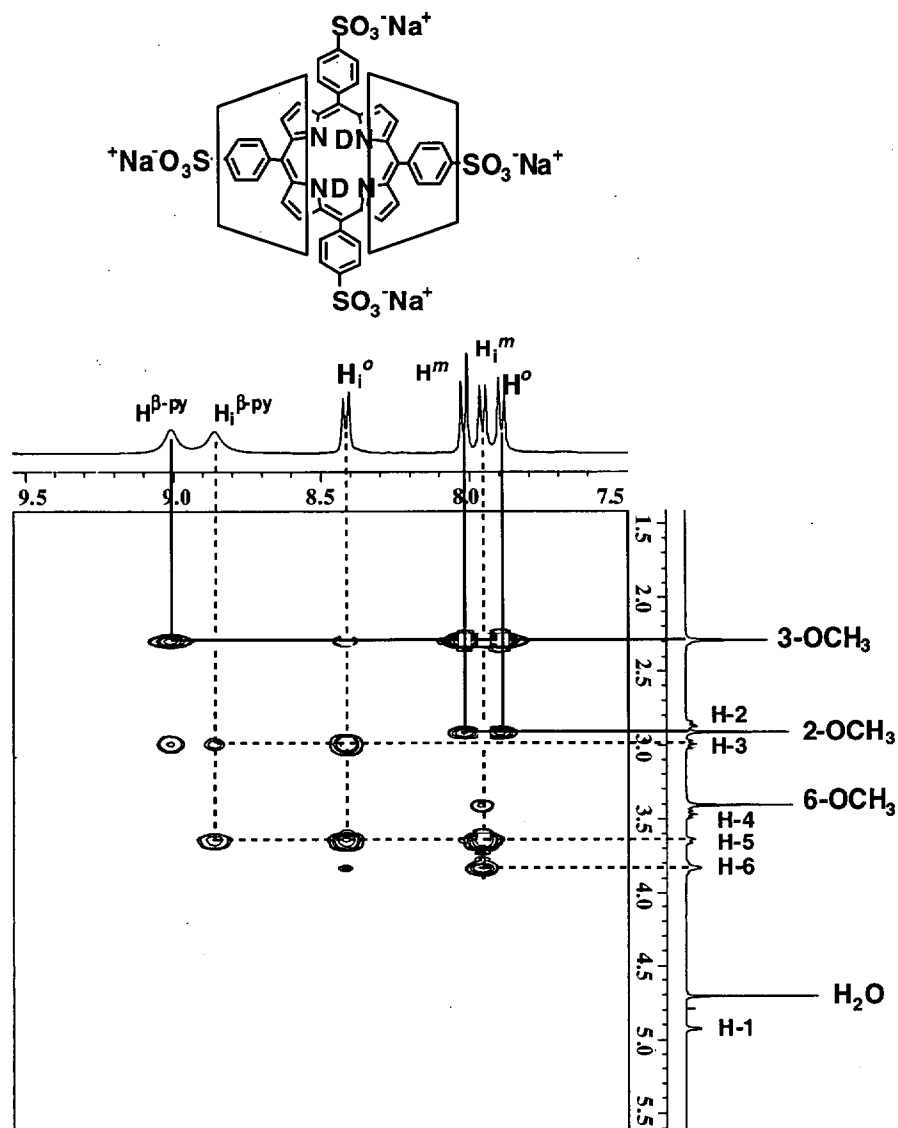

**SI Figure 2.** ROESY spectrum of the TMe- $\beta$ -CD-TPPS<sub>4</sub> complex in D<sub>2</sub>O at 25 °C: [TPPS<sub>4</sub>]<sub>0</sub> = 0.05 M; [TMe- $\beta$ -CD]<sub>0</sub> = 0.1 M

In SI Figure 1, H<sub>a</sub> <sup>$\beta$ -py</sup> and H<sub>b</sub> <sup>$\beta$ -py</sup> correlate with H<sub>a</sub><sup>o</sup> and H<sub>b</sub><sup>o</sup>, respectively, indicating H<sub>a</sub><sup>o</sup> and H<sub>b</sub><sup>o</sup> are the *ortho*-protons of the phenyl ring of TPPS<sub>4</sub>. Hence H<sub>a</sub><sup>m</sup> and H<sub>b</sub><sup>m</sup> should be the *meta*-protons. From the ROESY spectrum in SI Figure 2, it becomes clear that H<sub>a</sub><sup>o</sup> is the *ortho*-proton (H<sub>i</sub><sup>o</sup>) of the phenyl ring included by TMe- $\beta$ -CD because there are the cross peaks between H<sub>a</sub><sup>o</sup> of TPPS<sub>4</sub> and H-3, H-5, and 3-OCH<sub>3</sub> of TMe- $\beta$ -CD, while H<sub>b</sub><sup>o</sup> does not correlate with H-3 and H-5 but correlates with 2-OCH<sub>3</sub> and 3-OCH<sub>3</sub>. Therefore, H<sub>b</sub><sup>o</sup> can be assigned to be the *ortho*-proton (H<sup>o</sup>) of the phenyl ring that is free from inclusion by the CD. Since H<sub>i</sub><sup>o</sup> correlates with H<sub>a</sub> <sup>$\beta$ -py</sup>, H<sub>a</sub> <sup>$\beta$ -py</sup> is assigned to be the pyrrole proton (H<sub>i</sub> <sup>$\beta$ -py</sup>) which is included by TMe- $\beta$ -CD. All proton signals of TPPS<sub>4</sub> have been assigned by such a procedure.

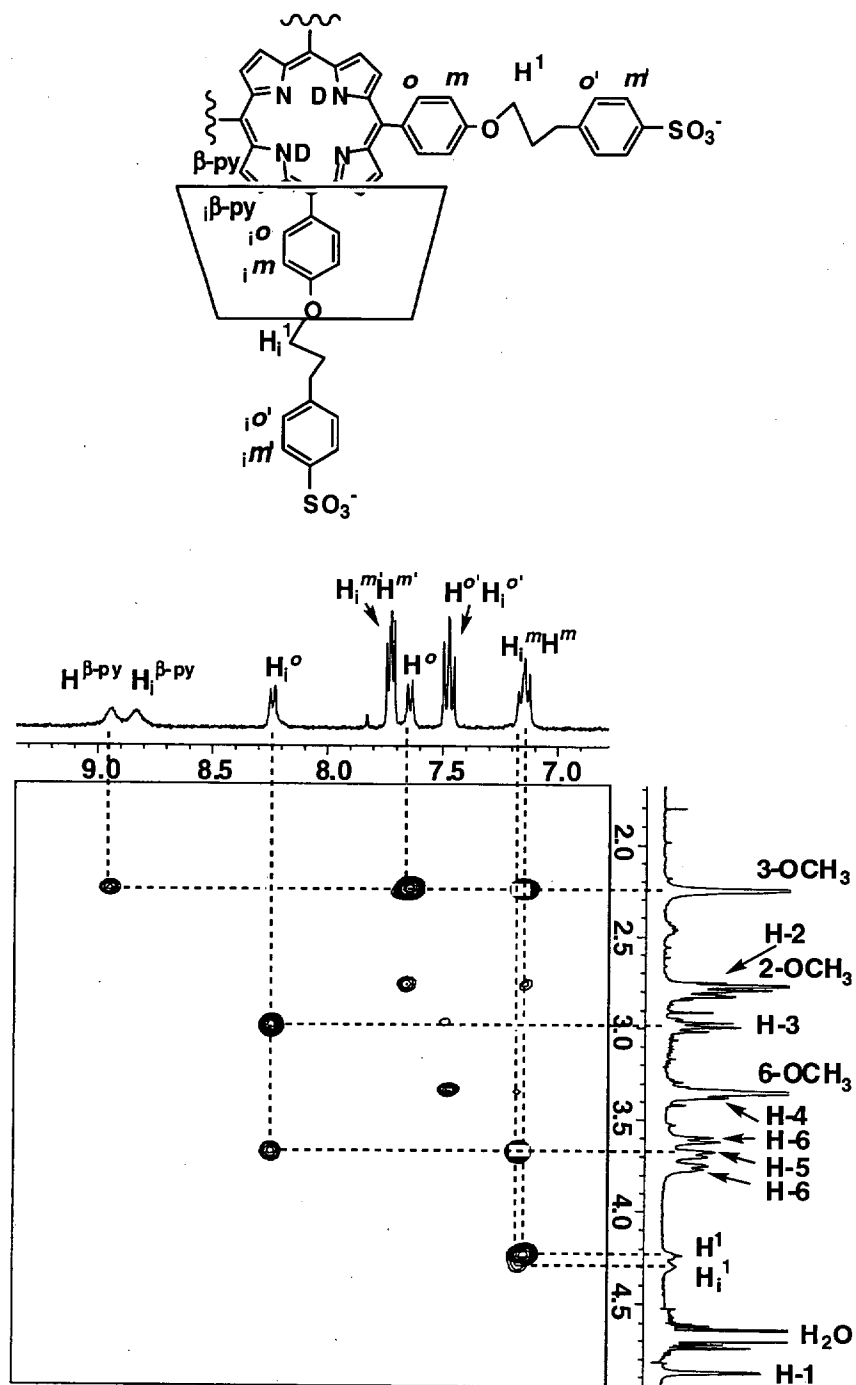

SI Figure 3. ROESY spectrum of the TMe-β-CD-TPPOCPS complex in D<sub>2</sub>O at 25 °C: [TPPOC3PS]<sub>0</sub> = 1.0 x 10<sup>-3</sup> M, [TMe-β-CD]<sub>0</sub> = 2.0 x 10<sup>-3</sup> M. H-n denotes the proton of TMe-β-CD at the n-position

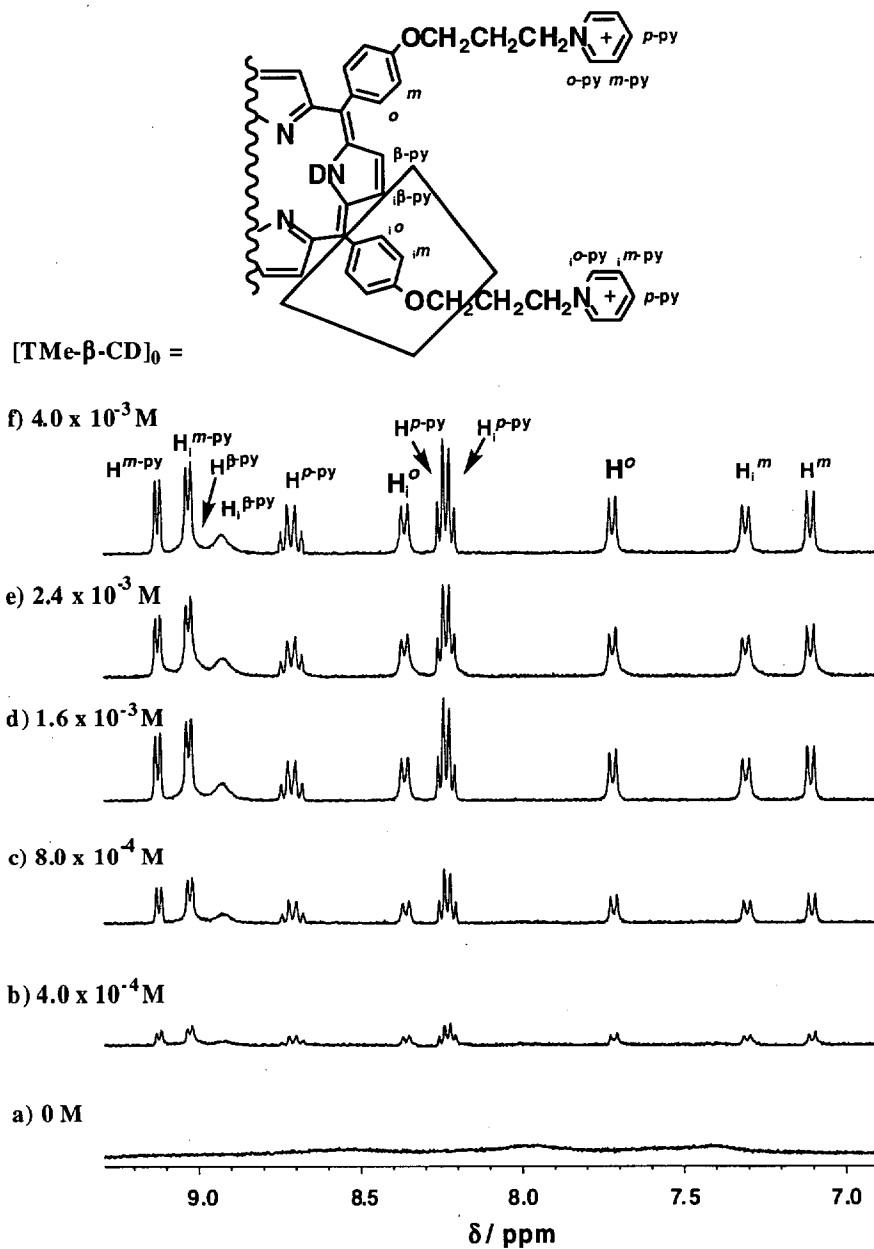

SI Figure 4.  $^1H$  NMR spectra of TPPOC3Py ( $8.0 \times 10^{-4}$  M) in  $D_2O$  at 25 °C in the absence and the presence of various amounts of TMe- $\beta$ -CD.

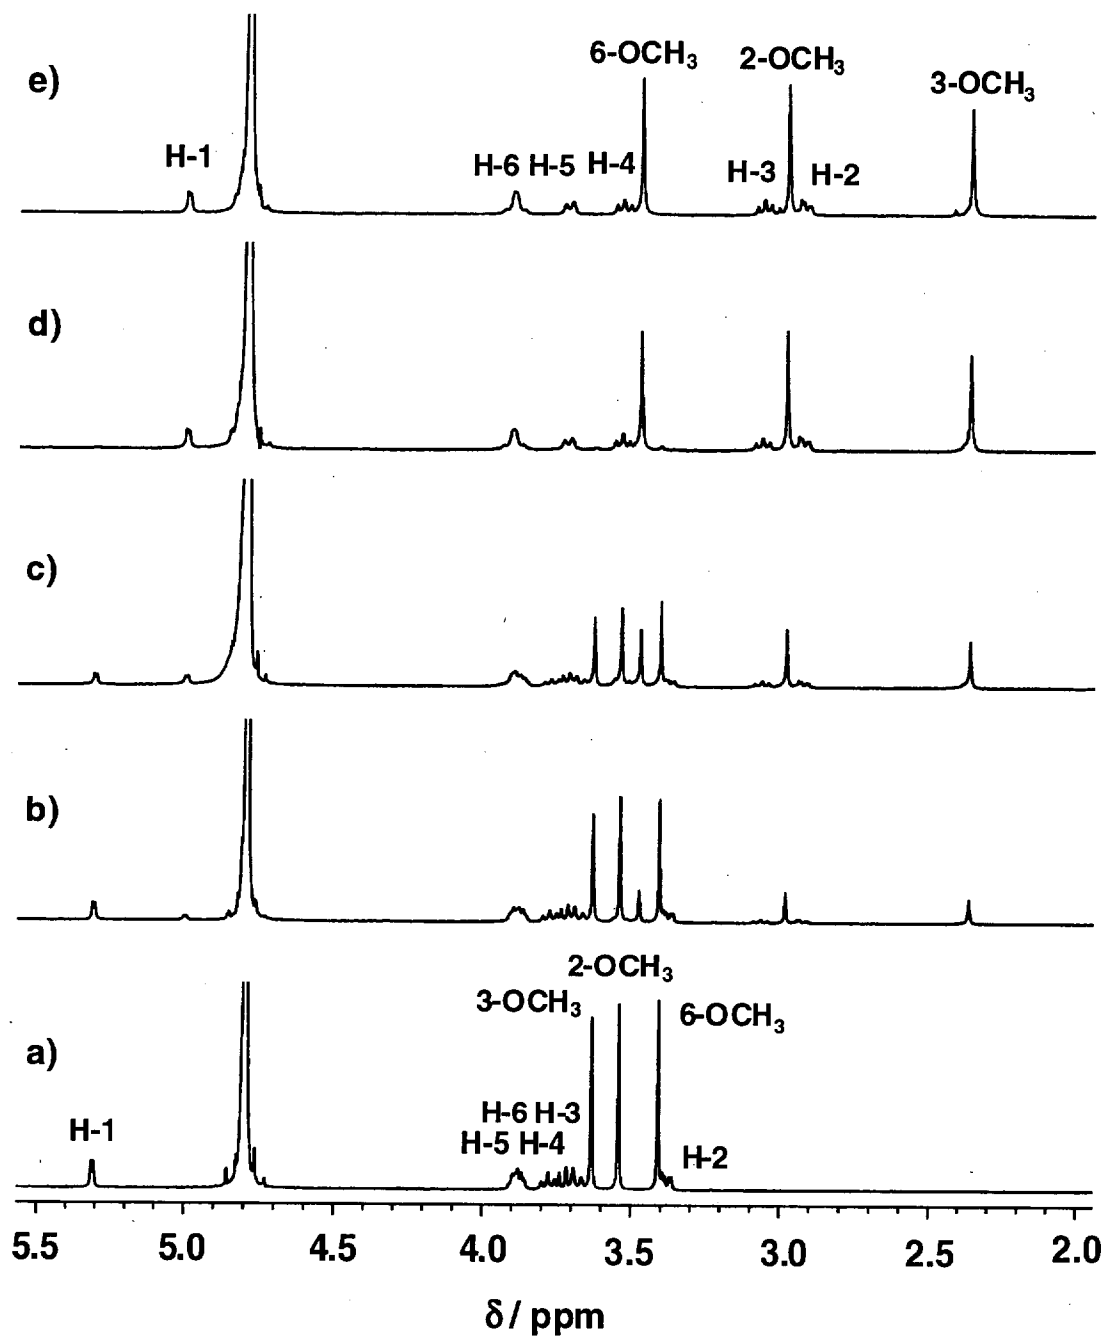

SI Figure 5.  $^1\text{H}$  NMR spectra of TMe- $\beta$ -CD ( $1.0 \times 10^{-3}$  M) in  $\text{D}_2\text{O}$  at 25  $^\circ\text{C}$  in the absence and the presence of various amounts of TPPS<sub>4</sub>: a) 0, b)  $0.125 \times 10^{-3}$ , c)  $0.25 \times 10^{-3}$ , d)  $0.5 \times 10^{-3}$ , and e)  $1.0 \times 10^{-3}$ .

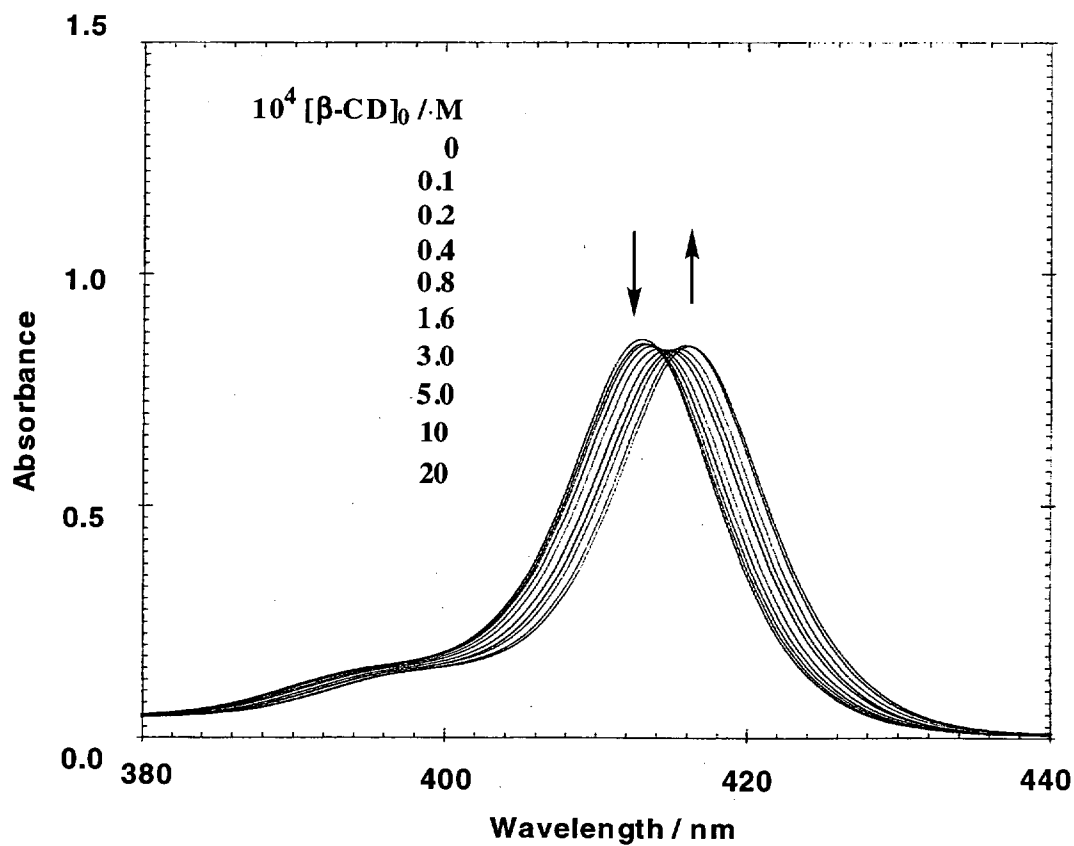

SI Figure 6. Absorption spectra of TPPS<sub>4</sub> (2.0 × 10<sup>-6</sup> M) in water containing various amounts of β-CD at 25 °C.

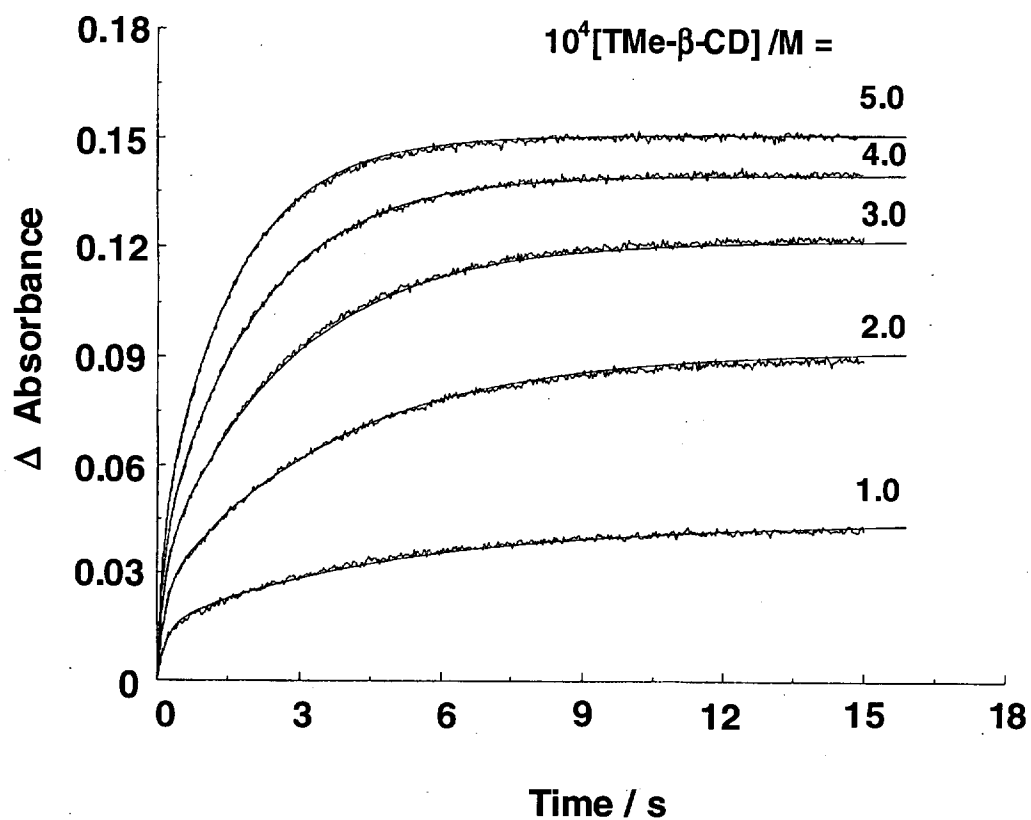

SI Figure 7. Time-courses of the absorbances of TPPOC3Py ( $5.0 \times 10^{-6}$  M) at 411.2 nm after addition of various amounts of TMe- $\beta$ -CD in ethylene EG-H<sub>2</sub>O (3:1) at 25 °C. The solid lines are theoretical curves.

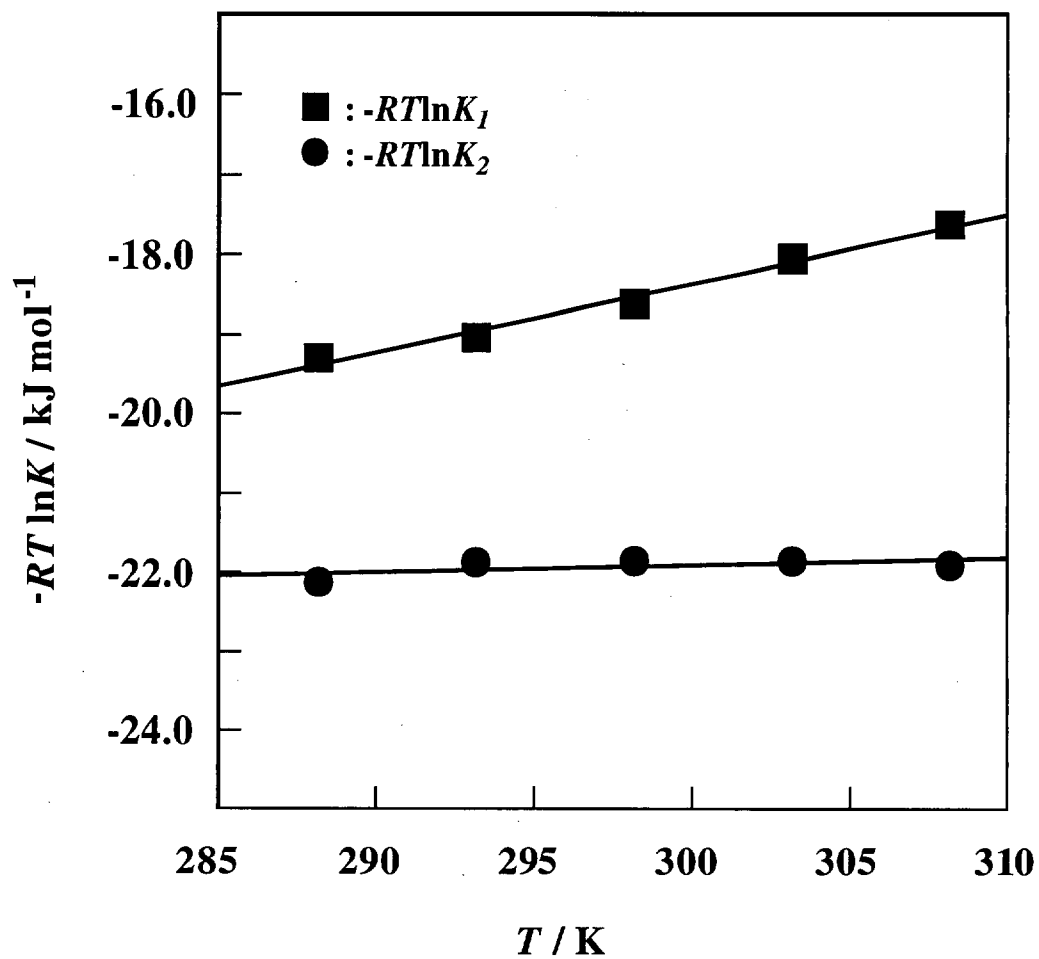

**SI Figure 8.** van't Hoff plots for complexation of TPPOC3Py with TMe- $\beta$ -CD in ethylene glycol-water (1:1).



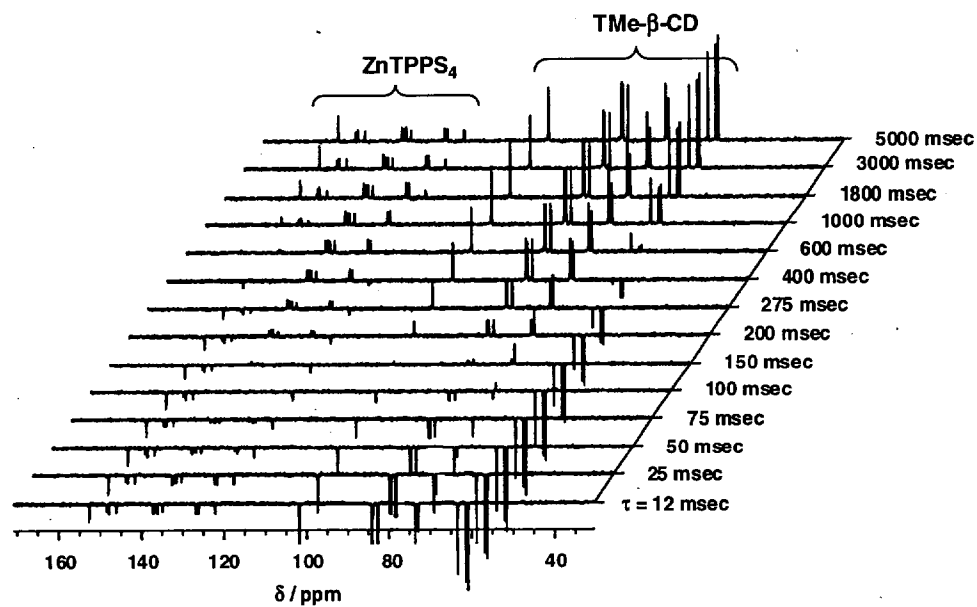

**SI Figure 9.** Measurements of  $^{13}\text{C}$ - $T_1$  for TMe- $\beta$ -CD-ZnTPPS<sub>4</sub> complex in D<sub>2</sub>O by the inversion-recovery method ( $180^\circ$ - $\tau$ - $90^\circ$ - $T_N$ ): Conditions,  $T (> 5T_1)$ ; 11.0 s,  $[\text{ZnTPPS}_4] = 0.05$  M,  $[\text{TMe-}\beta\text{-CD}] = 0.1$  M.

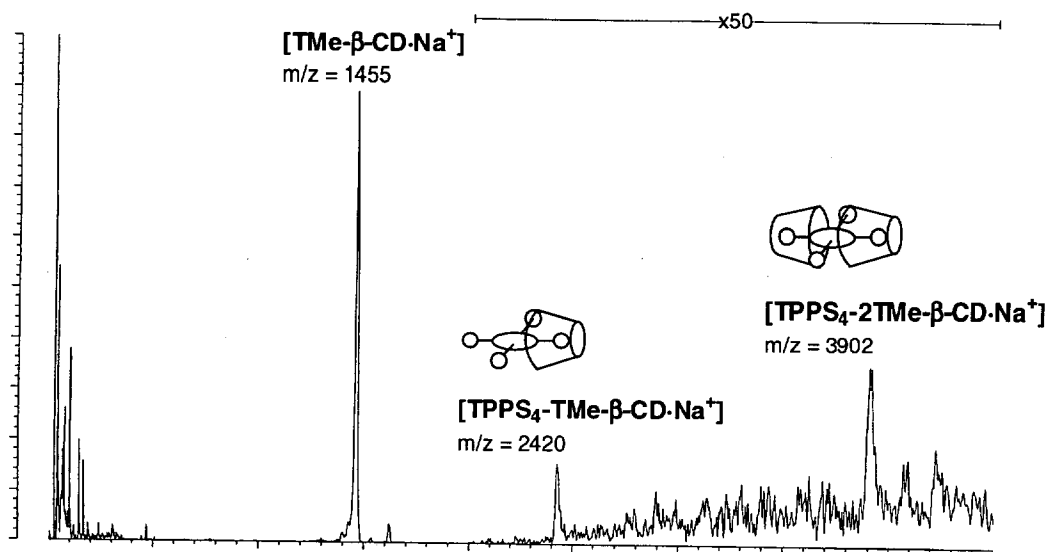

**SI Figure 10.** MALDI-TOF MS of TPPS<sub>4</sub>-TMe- $\beta$ -CD complex prepared in H<sub>2</sub>O and cationized with  $\alpha$ -cyano-4-hydroxycinnamic acid (CHCA) matrix. A Shimadzu/Kratos KOMPACT MALDI IV spectrometer was used for measurement.

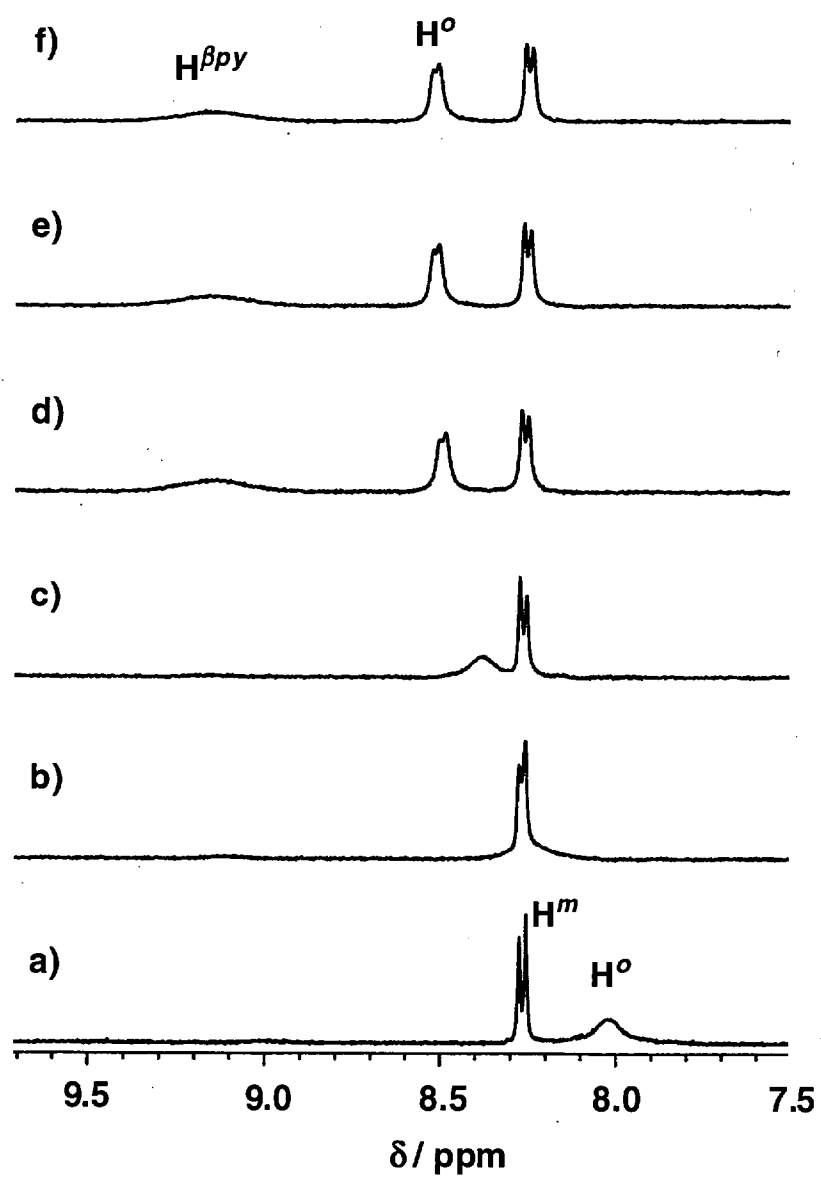

**SI Figure 11.** <sup>1</sup>H NMR spectra of TPPS<sub>4</sub> ( $1 \times 10^{-3}$  M) in D<sub>2</sub>O at 25 °C in the absence and the presence of various amounts of β-CD: a) 0, b)  $0.5 \times 10^{-3}$ , c)  $1 \times 10^{-3}$ , d)  $2 \times 10^{-3}$ , e)  $4 \times 10^{-3}$ , and f)  $8 \times 10^{-3}$  M.

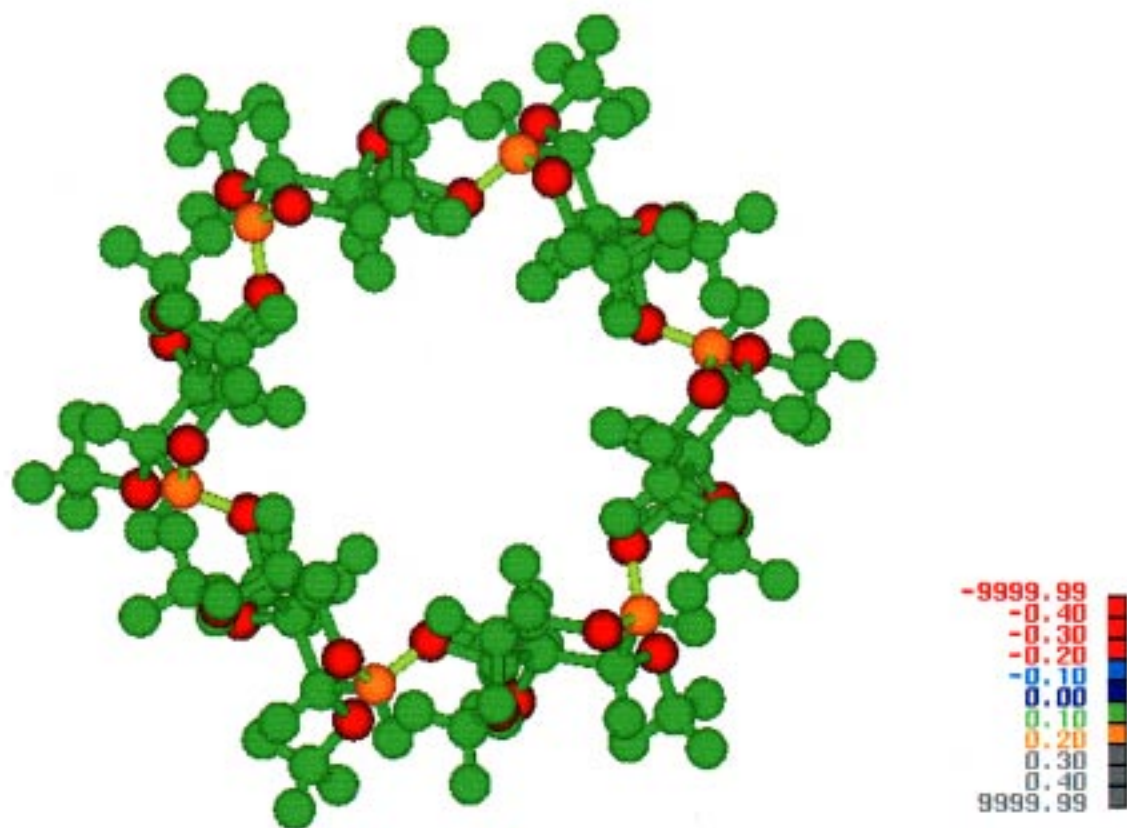

**SI Figure 12.** Mulliken's population of heptakis(2,3,6-tri-O-methyl)- $\alpha$ -cyclodextrin evaluated from MOPAC.

## Reliability of the method for determining rate constants

The reliability of the present method for determining the  $k_1$ ,  $k_{-1}$ ,  $k_2$ , and  $k_{-2}$  values was checked. Professor Pasternack at Swarthmore College, who was a distinguished visiting professor of Doshisha University, kindly offered his own program to determine  $k_1$ ,  $k_{-1}$ , and  $k_2$  where unknown parameters are reduced to three. Detail of this analytical method is omitted in this Supporting Information because we need large space to explain. Professor Pasternack's method is theoretically understandable when the condition of  $[\text{Por}] \ll [\text{TMe-}\beta\text{-CD}]$  is held. Comparison of these two analytical methods can be possible from the data shown in SI Table 1.

**SI Table 1.** Comparison of rate constants obtained using independent two analytical methods for complexation of TPPOC3Py and TPPOC2Py with TMe- $\beta$ -CD in EG-water (1:1) at 25 °C

| method     | porphyrin | $10^{-3}k_1/\text{M}^{-1}\text{s}^{-1}$ | $k_{-1}/\text{s}^{-1}$ | $10^{-3}k_2/\text{M}^{-1}\text{s}^{-1}$ | $10^2k_{-2}/\text{s}^{-1}$ |
|------------|-----------|-----------------------------------------|------------------------|-----------------------------------------|----------------------------|
| this work  | TPPOC3Py  | 13±0.2                                  | 0.41±0.01              | 3.6±0.1                                 | 2.6±0.1                    |
| this work  | TPPOC2Py  | 11±0.3                                  | 0.35±0.01              | 3.7±0.4                                 | 3.2±0.5                    |
| Pasternack | TPPOC3Py  | 13                                      | 0.28                   | 3.4                                     | nd                         |
| Pasternack | TPPOC2Py  | 10                                      | 0.21                   | 3.4                                     | nd                         |

The  $k_1$  and  $k_2$  values obtained from the present method are in excellent agreement with those from the Prof. Pasternack's method. The rate constants for the backward reactions from the present method are somewhat larger than those from the Prof. Pasternack's method, because Prof. Pasternack's method involves presumption to victimize reaction rates of backward processes. However, we can confirm that our method applied in this study is reliable.

**Analytical Data of TPPOC3PS and Its Precursors.**

**Phenyl 4-(3-bromopropyl)benzenesulfonate.**  $^1\text{H}$  NMR ( $\text{CDCl}_3$ , TMS):  $\delta$  7.75 (d, 2H, arom), 7.35 (d, 2H, arom), 7.24-7.27 (m, 3H, arom), 6.98 (d, 2H, arom), 3.38 (t, 2H,  $\text{BrCH}_2$ ), 2.88 (t, 2H,  $\text{CH}_2\text{Ph}$ ), 2.15-2.22 (m, 2H,  $\text{CH}_2$ ). FAB $^+$ MS ( $m/z$ ): 335 M +  $\text{H}^+$ .

**5,10,15,20-Tetrakis{4-[3-(4-phenoxy sulfonylphenyl)propoxy]phenyl}porphyrin.**  $^1\text{H}$  NMR ( $\text{CDCl}_3$ , TMS):  $\delta$  8.87 (s, 8H, pyrrole), 8.12 (d, 8H, arom), 7.83 (d, 8H, arom), 7.50 (d, 8H, arom), 7.26-7.34 (m, 12H, arom), 7.03 (d, 8H, arom), 4.27 (t, 8H,  $\text{OCH}_2$ ), 3.11 (t, 8H,  $\text{CH}_2\text{Ph}$ ), 2.32-2.35 (m, 8H  $\text{CH}_2$ ), -1.19 (s, 2H, NH). FAB $^+$ MS ( $m/z$ ): 1777 M +  $\text{H}^+$ .

**TPPOC3PS.**  $^1\text{H}$  NMR ( $\text{DMSO}-d_6$ , TMS):  $\delta$  8.87 (s, 8H, pyrrole), 8.11 (d, 8H, arom), 7.60 (d, 8H, arom), 7.39 (d, 8H, arom), 7.32 (d, 8H, arom), 4.29 (t, 8H,  $\text{OCH}_2$ ), 2.92 (t, 8H,  $\text{CH}_2\text{Ph}$ ), 2.22 (m, 8H,  $\text{CH}_2$ ), -2.89 (s, 2H, NH). Anal. Calcd for  $\text{C}_{80}\text{H}_{66}\text{N}_4\text{O}_{16}\text{S}_4\text{Na}_4$ : C, 57.62; H, 4.71; N, 3.36. Found: C, 57.98; H, 4.43; N, 3.41.
